# Supplementary material
Source: Springer Nature journal article supplement (https://www.springermedizin.de/resource/supplementary/12889_2008_1437_MOESM6_ESM.pdf/9503866)

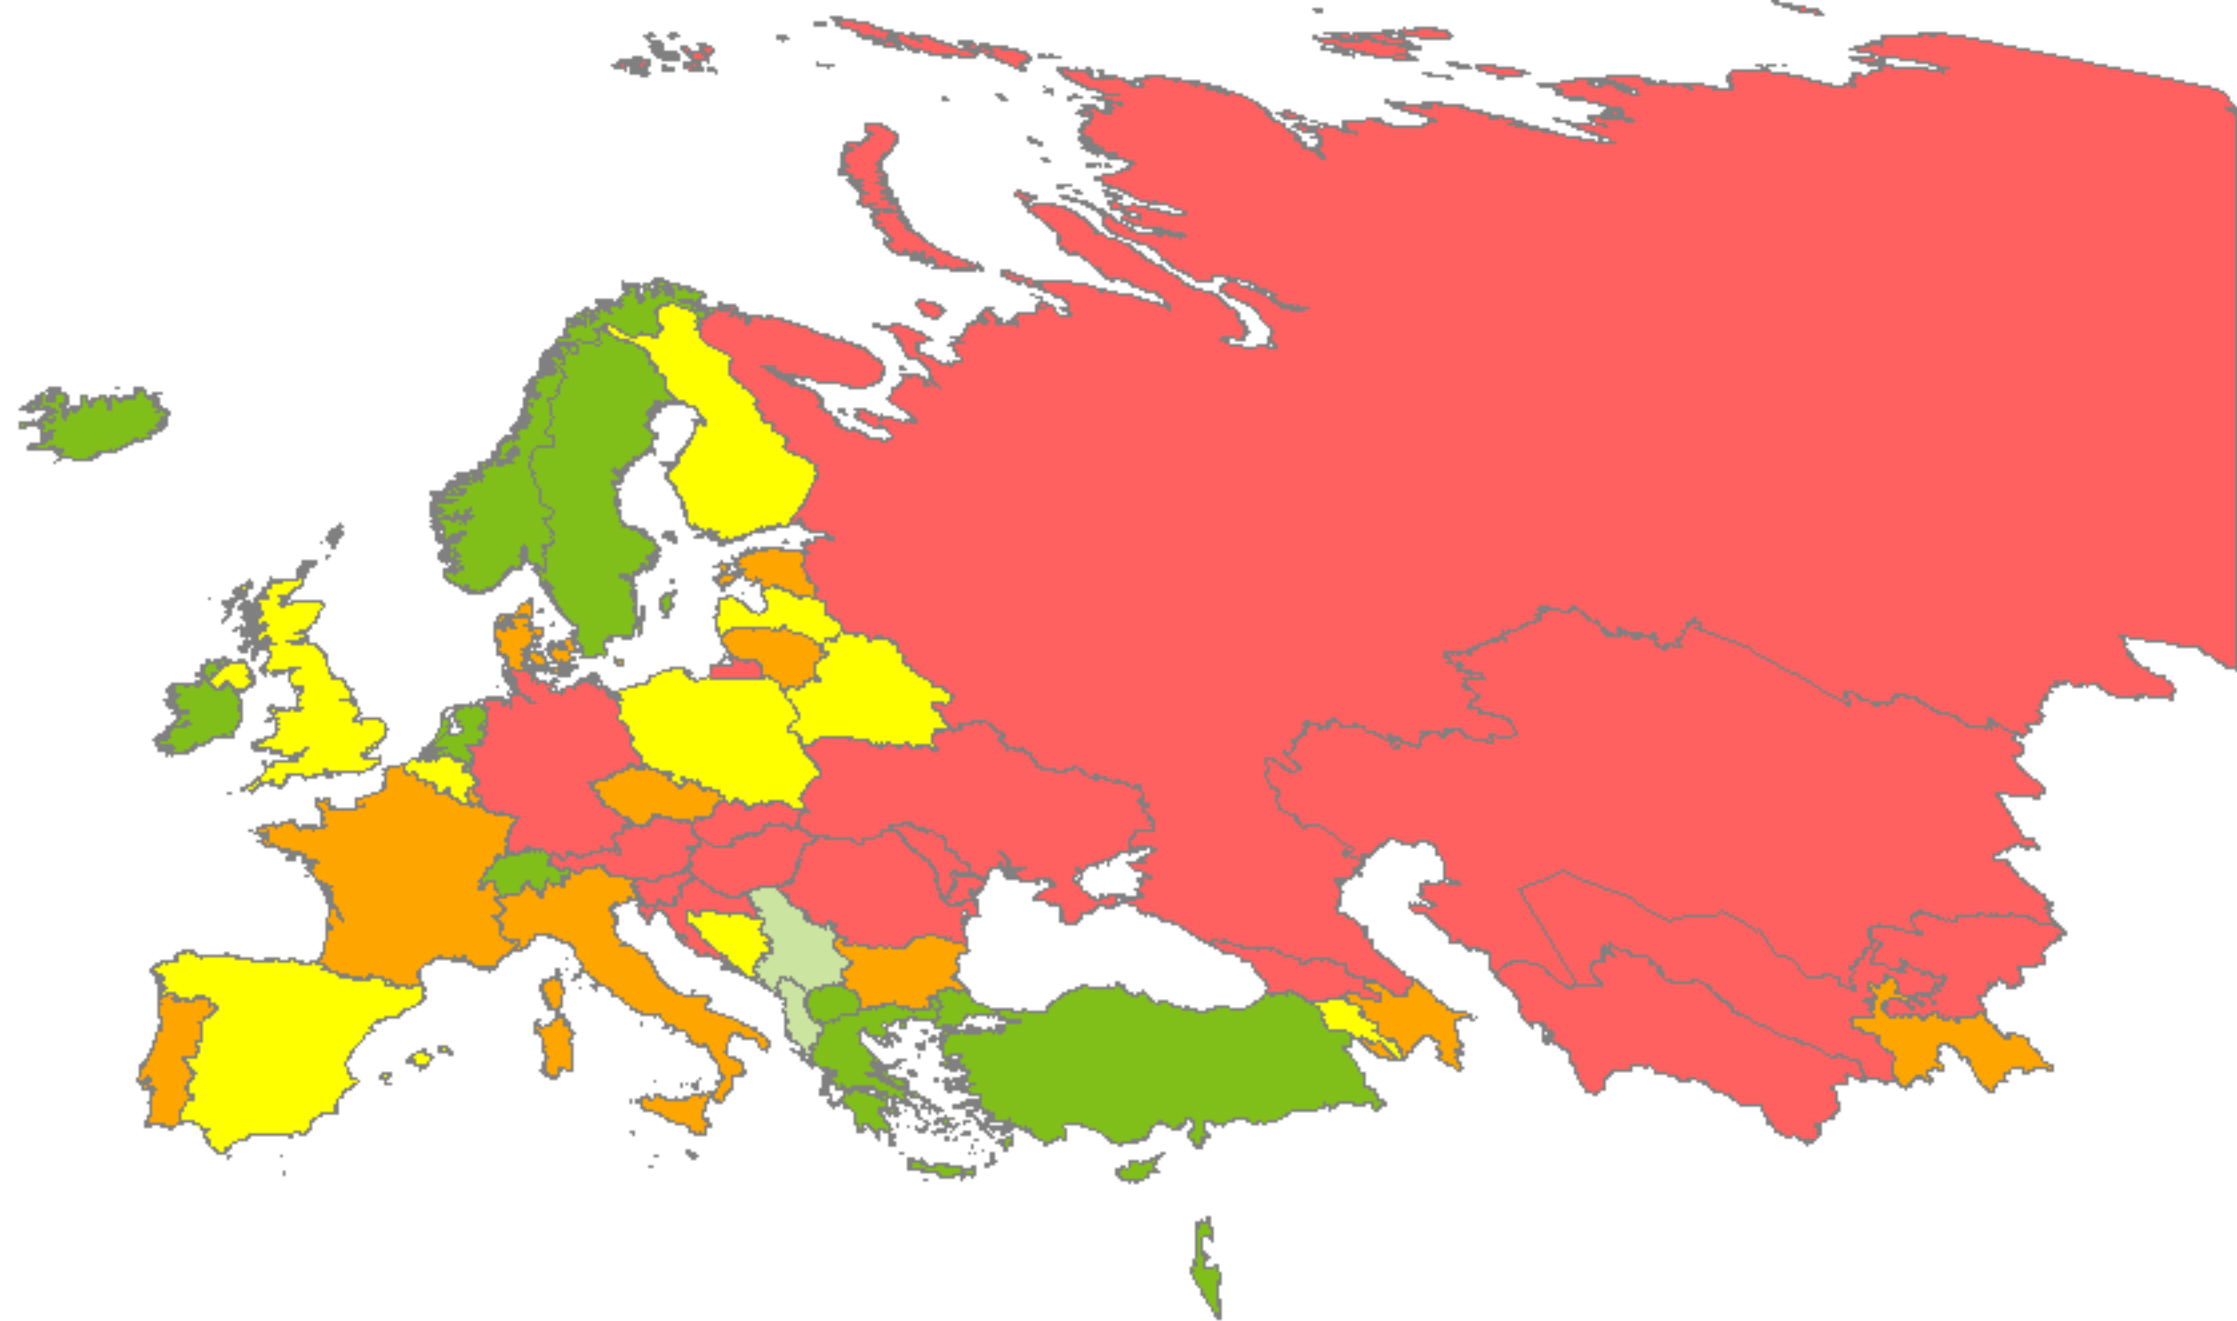

Death Rate HCV Cirrhosis  
(Deaths per 100 000):

|                                                                                             |                                                                                                |                                                                                             |                                                                                             |                                                                                             |
|---------------------------------------------------------------------------------------------|------------------------------------------------------------------------------------------------|---------------------------------------------------------------------------------------------|---------------------------------------------------------------------------------------------|---------------------------------------------------------------------------------------------|
|  no data |  $\leq 4$ |  4 – 6 |  6 – 8 |  $> 8$ |
|---------------------------------------------------------------------------------------------|------------------------------------------------------------------------------------------------|---------------------------------------------------------------------------------------------|---------------------------------------------------------------------------------------------|---------------------------------------------------------------------------------------------|

Supplement: MOESM6 [file 9503866]
